# Supplementary material for: RGD-presenting peptides in amphiphilic and anionic β-sheet hydrogels for improved interactions with cells
Source: Royal Society of Chemistry journal article supplement (doi:10.1039/c7ra12503h), 2018-01-01
Supplement: c7ra12503h1.pdf [file c7ra12503h1.pdf]

**Supplementary Information**  
**RGD-presenting peptides in amphiphilic and anionic  $\beta$ -sheet hydrogels for improved interactions with cells**  
Hodaya Green, Guy Ochbaum, Anna Gitelman Povimonsky, Ronit Bitton, Hanna Rapaport

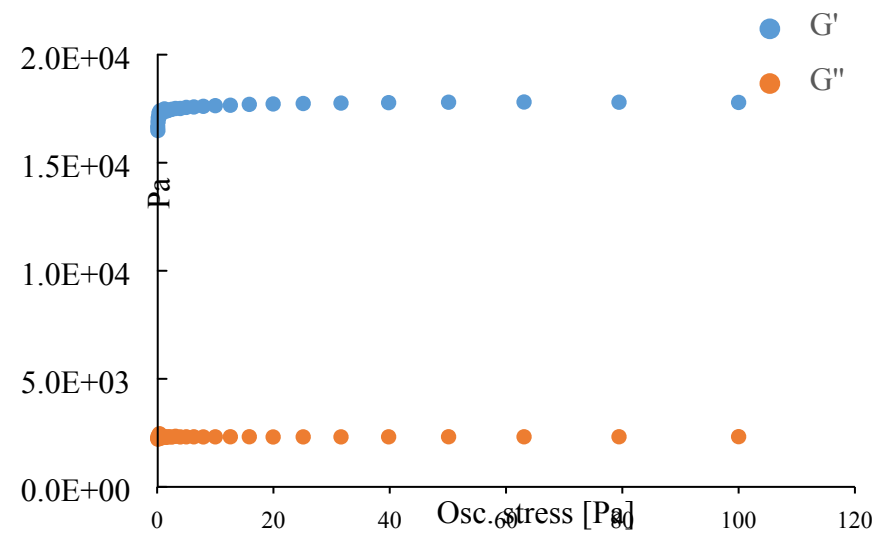

**Figure S1:** Strain sweep test at constant frequency used to determine the linear viscoelastic region of FD-RGD hydrogel.

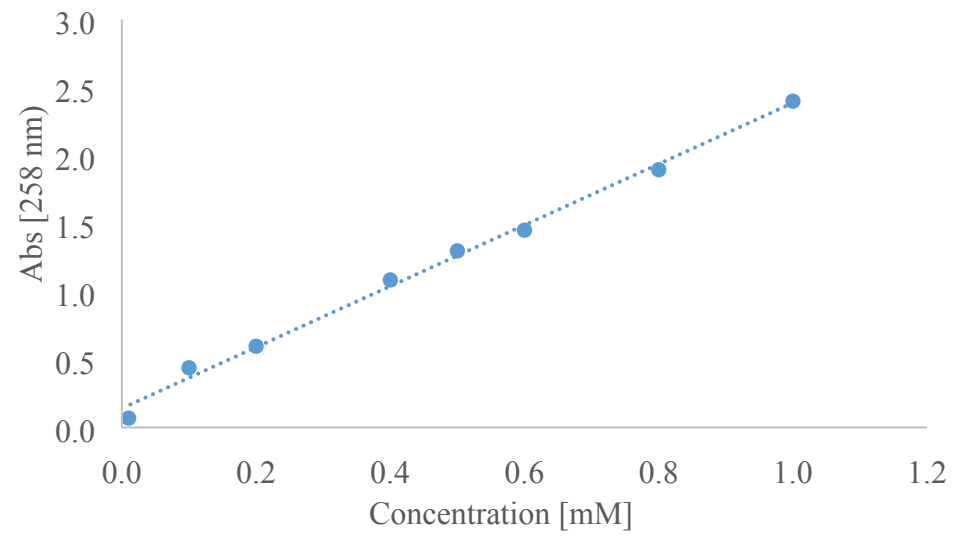

**Figure S2:** calibration curve of FD peptide prepared in this medium.

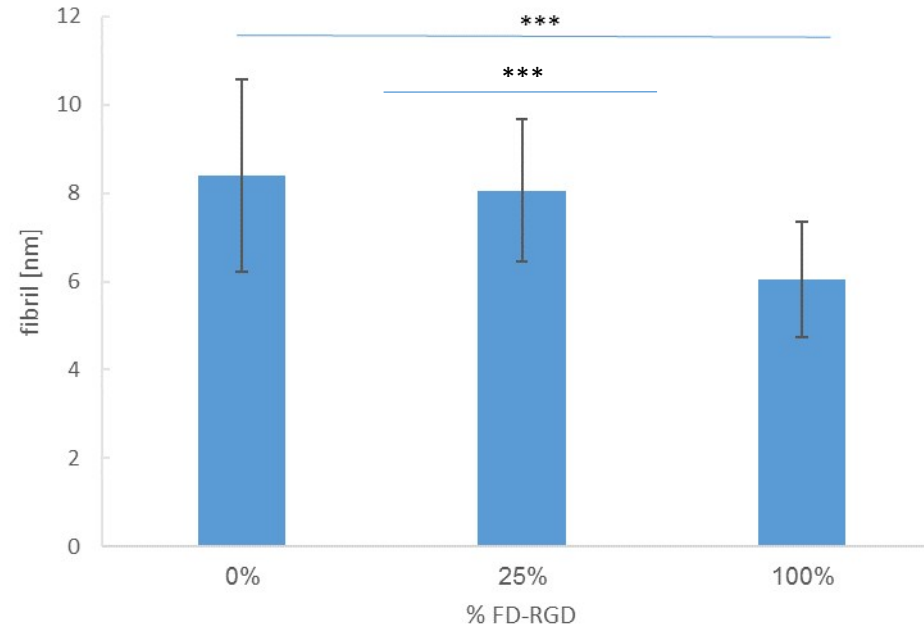

**Figure S3:** Mean fibrils thickness in different hydrogels (based on Figure 3 cryo-TEM images). Fibrils thickness was calculated using the ImageJ software for 3 TEM images and 20 fibrils in each image. Statistical analysis by T-test \*\*\*  $p < 0.001$ , error bar- standard deviation.

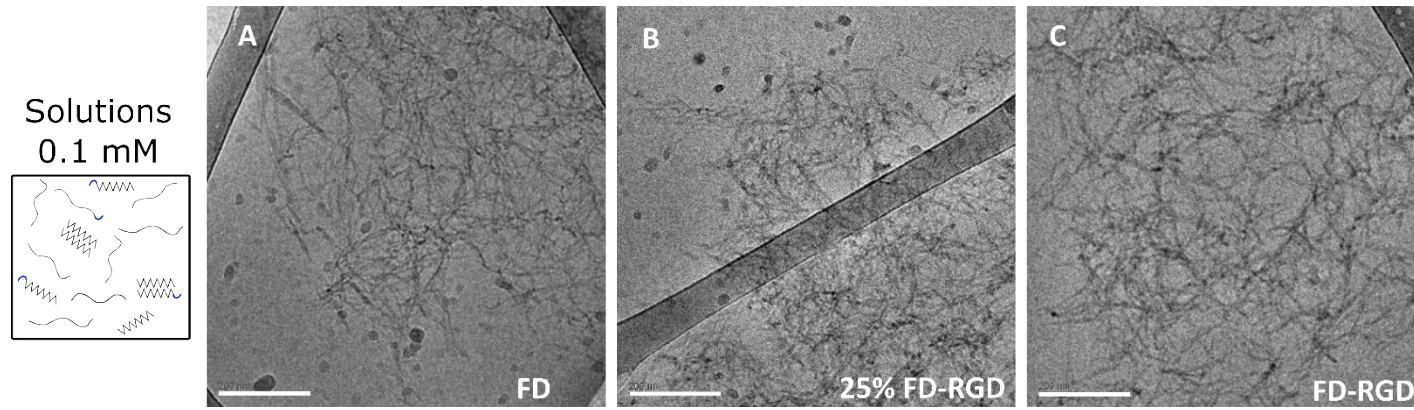

**Figure S4:** TEM images of 0.1 mM (0.02 % w/v) solutions demonstrating lower extent of fibrils that do not generate hydrogels.

## Modeling of small-angle scattering patterns

### Core Shell Cylinder

FD can be described by a form factor for a core-shell cylinder given by:

$$p(q) = \frac{scale}{V_{shell}} \int_0^{\pi/2} f^2(q, \alpha) \sin \alpha d\alpha \quad (eq 1)$$

$$f(q, \alpha) = 2(\rho_{core} - \rho_{shell})V_{core}J_0(qH \cos \alpha) \frac{J_1(qr \sin \alpha)}{qr \sin \alpha} +$$

$$2(\rho_{shell} - \rho_{solvent})V_{shell}J_0[(qH + t) \cos \alpha] \frac{J_1(q(r+t) \sin \alpha)}{q(r+t) \sin \alpha}$$

Where  $r$  is the radius of the core of the cylinder, and  $J_1(x)$  is the first order Bessel function. Alpha is defined as the angle between the cylinder axis and the scattering vector,  $q$ .

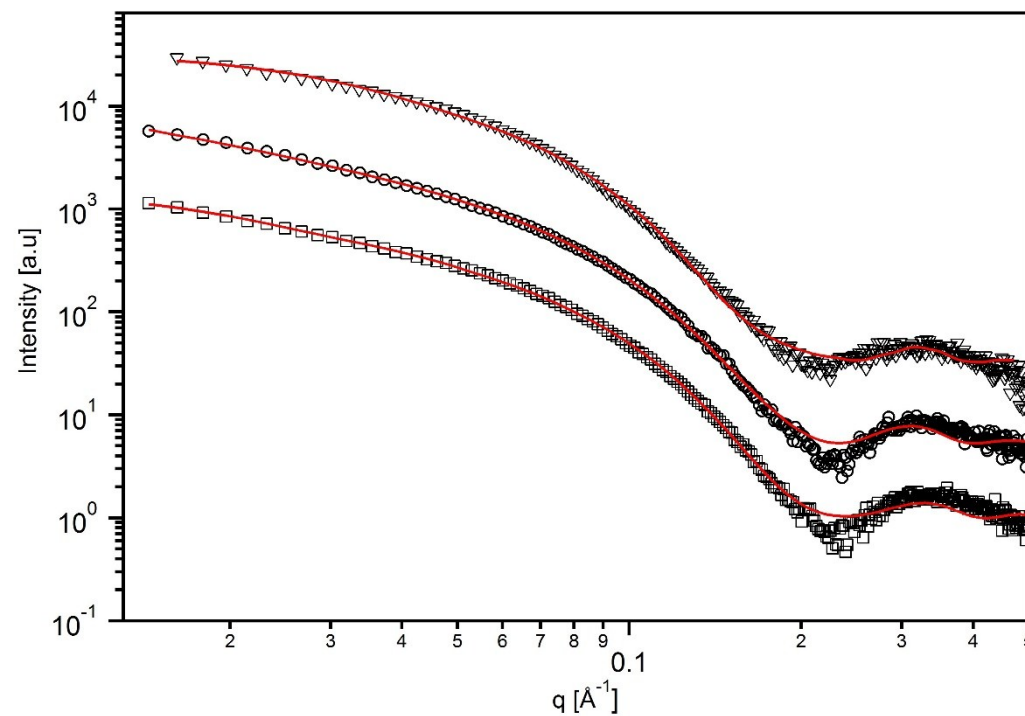

**Figure S5.** Small angle scattering curves of the 5% w/v hydrogels. FD (○) 25 mol% FD-RGD (□), and FD-RGD (△). The solid black lines represent fits to the core-shell cylinder model. The best fit parameters were: core radius 17 Å, and shell thickness 18 Å. The solid red lines represent fits to the model described by eq.1. The curves are shifted to facilitate better visualization.

**Table S1** Dissolution assay of FD and FD-RGD mixed peptide hydrogels. Both FD and FD-RGD were prepared as 5% w/v stock solutions from which mixtures were prepared. Peptide and calcium concentrations were measured post 72 hours of incubation (n =5)

| Theoretical composition of mixed hydrogels |             |           |       |                                 | Measured concentrations in prepared hydrogels |                                             |                                         |                                                     |                                     |                                                              |
|--------------------------------------------|-------------|-----------|-------|---------------------------------|-----------------------------------------------|---------------------------------------------|-----------------------------------------|-----------------------------------------------------|-------------------------------------|--------------------------------------------------------------|
| weight % FD-RGD                            | weight % FD | mM FD-RGD | mM FD | Total initial peptides conc. mM | Measured peptides conc. before incubation mM  | Measured peptides conc. after incubation mM | % peptides in hydrogel after incubation | Measured Ca <sup>2+</sup> conc. after incubation mM | % Ca <sup>2+</sup> after incubation | anionic groups in hydrogel/Ca <sup>2+</sup> after incubation |
|                                            | 5           |           | 30.5  | 30.5                            | 30.5                                          | 29.5                                        | 96.7                                    | 21.8                                                | 105                                 | 8.1                                                          |
| 0.5                                        | 4.5         | 2.2       | 27.5  | 29.7                            | 30.7                                          | 29.9                                        | 97.4                                    | 21.5                                                | 103                                 | 8.3                                                          |
| 1                                          | 4           | 4.5       | 24.4  | 28.9                            | 30.4                                          | 29.5                                        | 97.0                                    | 21                                                  | 101                                 | 8.4                                                          |
| 1.5                                        | 3.5         | 6.7       | 21.4  | 28.1                            | 28.3                                          | 27.5                                        | 97.2                                    | 20.8                                                | 100                                 | 7.9                                                          |
| 2.5                                        | 2.5         | 11.2      | 15.3  | 26.5                            | 26.5                                          | 26.2                                        | 98.9                                    | 20.2                                                | 97                                  | 7.8                                                          |
| 5                                          | 0           | 22.5      | 0     | 22.5                            | 22.5                                          | 22.2                                        | 98.7                                    | 17.6                                                | 85                                  | 7.6                                                          |

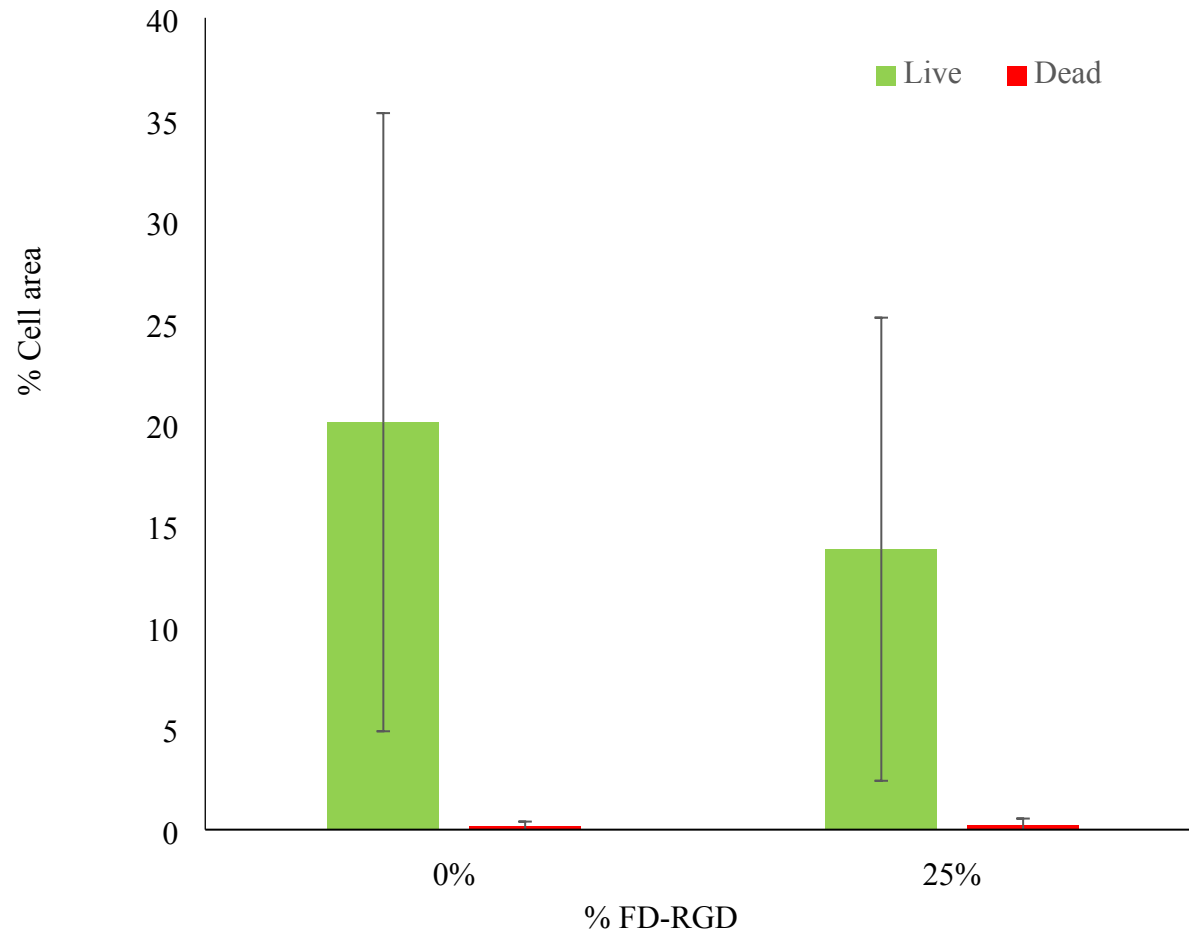

**Figure S6.** h-Fob cell line viability in FD hydrogel and 25 mol% FD-RGD hydrogel. Green bars- average of live cells in image and red bars- average of dead cells area in image. , there was no significant difference in overall cell viability between FD and 25 mol% FD-RGD.
